# Supplementary material for: Ultrasound-Based Method for the Identification of Novel MicroRNA Biomarkers in Prostate Cancer
Source: MDPI journal article supplement (doi:10.3390/genes12111726), 2021-10-28
Supplement: s1 [file s1]

## SUPPLEMENTARY INFORMATION

### SUPPLEMENTARY TABLES

**Supplementary Table S1. Cell-free miRNAs profiling of US-treated LNCaP and DU145 cells.**

| LNCaP                       |             |                                            |         |
|-----------------------------|-------------|--------------------------------------------|---------|
| microRNA                    | Fold Change | Log2 Fold Change<br>(US treated/untreated) | p-value |
| hsa-miR-193b-3p-478314_mir* | 3.034       | 1.60122109                                 | 0.018   |
| hsa-miR-425-5p-478094_mir*  | 5.129       | 2.35867757                                 | 0.028   |
| hsa-miR-365b-3p-478065_mir* | 4.698       | 2.23204671                                 | 0.036   |
| hsa-miR-629-5p-478183_mir*  | 2.274       | 1.18523225                                 | 0.038   |
| hsa-miR-30b-5p-478007_mir   | 3.098       | 1.63133714                                 | 0.051   |
| hsa-miR-374a-5p-478238_mir  | 2.55        | 1.35049725                                 | 0.060   |
| hsa-miR-28-5p-478000_mir    | 2.096       | 1.06763872                                 | 0.112   |
| hsa-miR-342-3p-478043_mir   | 2.595       | 1.37573454                                 | 0.110   |
| hsa-miR-30c-5p-478008_mir   | 3.509       | 1.81105995                                 | 0.101   |
| hsa-miR-99b-5p-478343_mir   | 5.627       | 2.49236596                                 | 0.137   |
| hsa-miR-200c-3p-478351_mir  | 3.2         | 1.67807191                                 | 0.135   |
| hsa-miR-194-5p-477956_mir   | 4.416       | 2.14274017                                 | 0.195   |
| hsa-miR-148b-3p-477824_mir  | 2.488       | 1.31498649                                 | 0.265   |
| hsa-miR-2110-477971_mir     | 3.086       | 1.62573806                                 | 0.295   |
| hsa-miR-339-5p-478040_mir   | 2.739       | 1.45364927                                 | 0.397   |
| hsa-miR-21-3p-477973_mir    | 2.764       | 1.46675762                                 | 0.664   |
| hsa-miR-103a-3p-478253_mir  | 1.733       | 0.79327165                                 | 0.059   |
| hsa-miR-374b-5p-478389_mir  | 1.737       | 0.79659775                                 | 0.141   |
| hsa-miR-19a-3p-479228_mir   | 1.395       | 0.48026512                                 | 0.233   |
| hsa-miR-182-5p-477935_mir   | 1.711       | 0.77483976                                 | 0.282   |
| hsa-miR-195-5p-477957_mir   | 1.671       | 0.74071173                                 | 0.294   |
| hsa-miR-500a-5p-478309_mir  | 1.727       | 0.78826808                                 | 0.324   |
| hsa-miR-532-5p-478151_mir   | 1.826       | 0.86868677                                 | 0.34    |
| hsa-miR-222-3p-477982_mir   | 1.941       | 0.95680012                                 | 0.499   |
| hsa-miR-320e-478022_mir     | 1.573       | 0.65351867                                 | 0.401   |
| hsa-miR-25-3p-477994_mir    | 1.538       | 0.6210555                                  | 0.439   |
| hsa-miR-652-3p-478189_mir   | 1.526       | 0.60975496                                 | 0.464   |
| hsa-miR-378a-3p-478349_mir  | 1.529       | 0.61258841                                 | 0.485   |
| hsa-miR-132-3p-477900_mir   | 1.483       | 0.5685186                                  | 0.543   |
| hsa-miR-221-3p-477981_mir   | 1.492       | 0.57724754                                 | 0.601   |

| hsa-miR-125b-5p-477885_mir | 1.452     | 0.53804145     | 0.591          |
|----------------------------|-----------|----------------|----------------|
| hsa-miR-423-3p-478327_mir  | 1.424     | 0.50994915     | 0.5            |
| hsa-miR-186-5p-477940_mir  | 1.349     | 0.43189035     | 0.537          |
| hsa-miR-200a-3p-478490_mir | 1.309     | 0.3884651      | 0.563          |
| hsa-miR-34a-5p-478048_mir  | 1.288     | 0.36513259     | 0.657          |
| hsa-miR-29a-3p-478587_mir  | 1.257     | 0.32998465     | 0.611          |
| hsa-miR-93-5p-478210_mir   | 1.219     | 0.28569813     | 0.577          |
| hsa-miR-19b-3p-478264_mir  | 1.225     | 0.29278175     | 0.436          |
| hsa-miR-191-5p-477952_mir  | 1.276     | 0.35162833     | 0.4            |
| hsa-miR-92a-3p-477827_mir  | 1.321     | 0.40163047     | 0.291          |
| hsa-miR-26b-5p-478418_mir  | 1.188     | 0.24853484     | 0.621          |
| hsa-miR-26a-5p-477995_mir  | 1.153     | 0.20539251     | 0.629          |
| hsa-miR-21-5p-477975_mir   | 1.117     | 0.15962919     | 0.729          |
| hsa-miR-20a-5p-478586_mir  | 1.124     | 0.16864204     | 0.733          |
| hsa-miR-29b-3p-478369_mir  | 1.136     | 0.18396283     | 0.79           |
| hsa-miR-484-478308_mir     | 1.184     | 0.24366908     | 0.8            |
| hsa-miR-17-5p-478447_mir   | 1.07      | 0.0976108      | 0.831          |
| hsa-miR-28-3p-477999_mir   | 1.088     | 0.12167856     | 0.873          |
| hsa-miR-125b-5p-477885_mir | 1.098     | 0.13487805     | 0.918          |
| hsa-miR-301a-3p-477815_mir | 0.953     | -0.0694519     | 0.8            |
| hsa-let-7g-5p-478580_mir   | 0.927     | -0.1093588     | 0.789          |
| hsa-miR-339-3p-478325_mir  | 0.909     | -0.1376478     | 0.857          |
| hsa-miR-190a-5p-478358_mir | 0.945     | -0.0816138     | 0.923          |
| hsa-miR-148a-3p-477814_mir | 0.875     | -0.1926451     | 0.531          |
| hsa-miR-24-3p-477992_mir   | 0.838     | -0.2549779     | 0.686          |
| hsa-miR-324-5p-478024_mir  | 0.734     | -0.446148      | 0.737          |
| hsa-miR-151a-3p-477919_mir | 0.631     | -0.6642881     | 0.655          |
| hsa-miR-505-3p-478145_mir  | 0.514     | -0.9601597     | 0.343          |
| hsa-miR-130b-3p-477840_mir | 0.489     | -1.0320936     | 0.258          |
| hsa-miR-210-3p-477970_mir  | 0.441     | -1.1811494     | 0.322          |
| <b>DU145</b>               |           |                |                |
| <b>microRNA</b>            | <b>FC</b> | <b>Log2 FC</b> | <b>p-value</b> |
| hsa-let-7d-5p-478575_mir*  | 2.694     | 1.42974985     | 0.007          |
| hsa-miR-191-5p-477952_mir  | 2.135     | 1.09423607     | 0.312          |
| hsa-miR-21-5p-477975_mir   | 1.348     | 0.4308205      | 0.256          |
| hsa-miR-24-3p-477992_mir   | 1.525     | 0.60880924     | 0.337          |
| hsa-miR-342-3p-478043_mir  | 1.62      | 0.69599381     | 0.518          |
| hsa-miR-23a-3p-478532_mir  | 1.46      | 0.54596837     | 0.706          |
| hsa-miR-151a-3p-477919_mir | 1.29      | 0.36737107     | 0.791          |
| hsa-miR-15a-5p-477858_mir  | 1.228     | 0.29631056     | 0.691          |
| hsa-miR-10a-5p-479241_mir  | 1.175     | 0.23266076     | 0.819          |
| hsa-miR-31-5p-478015_mir   | 1.118     | 0.16092019     | 0.71           |

|                            |       |            |       |
|----------------------------|-------|------------|-------|
| hsa-miR-29b-3p-478369_mir  | 1.115 | 0.15704371 | 0.678 |
| hsa-miR-93-5p-478210_mir   | 1.104 | 0.14274017 | 0.589 |
| hsa-miR-26a-5p-477995_mir  | 1.05  | 0.07038933 | 0.922 |
| hsa-miR-99b-5p-478343_mir  | 0.973 | -0.0394883 | 0.978 |
| hsa-miR-652-3p-478189_mir  | 0.918 | -0.1234339 | 0.932 |
| hsa-miR-155-5p-477927_mir  | 0.907 | -0.1408255 | 0.935 |
| hsa-miR-181a-5p-477857_mir | 0.892 | -0.1648844 | 0.936 |
| hsa-miR-222-3p-477982_mir  | 0.883 | -0.1795147 | 0.903 |
| hsa-miR-25-3p-477994_mir   | 0.855 | -0.2260037 | 0.912 |
| hsa-miR-320a-478594_mir    | 0.811 | -0.3022262 | 0.868 |
| hsa-miR-423-3p-478327_mir  | 0.835 | -0.2601519 | 0.684 |
| hsa-let-7g-5p-478580_mir   | 0.822 | -0.2827897 | 0.549 |
| hsa-miR-125b-5p-477885_mir | 0.833 | -0.2636116 | 0.503 |
| hsa-miR-29a-3p-478587_mir  | 0.817 | -0.291592  | 0.501 |
| hsa-miR-186-5p-477940_mir  | 0.773 | -0.3714597 | 0.751 |
| hsa-miR-532-5p-478151_mir  | 0.713 | -0.488026  | 0.893 |
| hsa-miR-200c-3p-478351_mir | 0.692 | -0.5311561 | 0.77  |
| hsa-miR-193b-3p-478314_mir | 0.539 | -0.8916428 | 0.597 |
| hsa-miR-221-3p-477981_mir  | 0.507 | -0.9799423 | 0.378 |
| hsa-miR-502-3p-478348_mir  | 0.455 | -1.1360615 | 0.485 |
| hsa-miR-28-3p-477999_mir   | 0.308 | -1.6989977 | 0.536 |
| hsa-miR-500a-5p-478309_mir | 0.303 | -1.7226103 | 0.568 |

\*Significantly up-released miRNAs,  $p < 0.05$

## Supplementary Table S2. Enrichment analysis of validated miRNA:gene interactions followed by targeted pathway analysis.

| miRNAs               | miR-629-5p           | miR-374a-5p      |               |                 | miR-194-5p    |                      | let-7d-5p         |          |                 |
|----------------------|----------------------|------------------|---------------|-----------------|---------------|----------------------|-------------------|----------|-----------------|
| <b>KEGG pathways</b> | Steroid biosynthesis | UFA biosynthesis | Hippo pathway | Prostate cancer | Hippo pathway | Steroid biosynthesis | Adherens junction | Glioma   | Prostate cancer |
| <b>p-value</b>       | 4.63E-05             | 3.08E-08         | 3.085E-08     | 2.21E-02        | 2.65E-04      | 5.30E-04             | 1.94E-06          | 8.64E-03 | 2.37E-02        |

|              |        |          |         |         |        |        |         |         |        |          |
|--------------|--------|----------|---------|---------|--------|--------|---------|---------|--------|----------|
| Target Genes | DHCR24 | ELOVL5   | GSK3B   | NRAS    | TGFBF1 | DHCR24 | ACTB    | BRAF    | BRAF   |          |
|              |        | SCD      | YAP1    | PIK3CB  | YAP1   |        | CSNK2A2 | CDK4    | E2F2   |          |
|              |        | HSD17B12 | APC     | CDKN1B  | YWHAE  |        |         | TGFBF1  | E2F2   | NRAS     |
|              |        |          | NF2     | IGF1R   | CCND2  |        |         | WASF1   | NRAS   | HSP90AA1 |
|              |        |          | WNT5A   | KRAS    | ACTG1  |        |         | SMAD2   | IGF1R  | IGF1R    |
|              |        |          | CCND2   | CCND1   | CCND1  |        |         | ACTG1   | TP53   | TP53     |
|              |        |          | FZD6    | CTNNB1  | AXIN2  |        |         | SMAD3   | PLCG1  | AR       |
|              |        |          | WNT3    | CCNE2   | BMPR2  |        |         | IGF1R   | CCND1  | CCND1    |
|              |        |          | YWHAB   | PDGFC   |        |        |         | VCL     | E2F3   | CCNE2    |
|              |        |          | WWTR1   | CREB3L2 |        |        |         | TJP1    | PDGFB  | E2F3     |
|              |        |          | FZD3    | PTEN    |        |        |         | FYN     | CDKN1A | PDGFB    |
|              |        |          | MPP5    | MAPK1   |        |        |         | ACP1    | MTOR   | CDKN1A   |
|              |        |          | CCND1   | MDM2    |        |        |         | NLK     | MAPK1  | MTOR     |
|              |        |          | CTNNB1  |         |        |        |         | PTPN6   | MDM2   | FGFR1    |
|              |        |          | CTNNA1  |         |        |        |         | WASF2   |        | MAPK1    |
|              |        |          | FRMD6   |         |        |        |         | FER     |        | CREBBP   |
|              |        |          | TEAD1   |         |        |        |         | CSNK2A1 |        | MDM2     |
|              |        |          | LATS1   |         |        |        |         | FARP2   |        |          |
|              |        |          | FBXW11  |         |        |        |         | PTPRJ   |        |          |
|              |        |          | PPP2R1B |         |        |        |         | RAC1    |        |          |
|              |        |          | PARD6B  |         |        |        |         | INSR    |        |          |
|              |        |          | BMPR2   |         |        |        |         | FGFR1   |        |          |
|              |        |          | PPP1CB  |         |        |        |         | MAPK1   |        |          |
|              |        |          |         |         |        |        |         | CREBBP  |        |          |
|              |        |          |         |         |        |        |         | TGFBF2  |        |          |
